# Supplementary material
Source: Elsevier journal article supplement (https://www.sciencedirect.com/science/article/pii/S1888429621000200)
Supplement: mmc1 [file S1888429621000200:mmc1.docx]

SUPPLEMENTARY MATERIAL of the article: **VALIDATION OF THE SPANISH VERSION OF THE LOW VISION QUALITY OF LIFE QUESTIONNAIRE**

**Outcome of the NEI VFQ-25 questionnaire in the sample of patients with visual impairment** (Questionnaire score range 0-100, where 100 is poorest quality of life)

| Domains | Mean | Standard deviation |
| --- | --- | --- |
| General vision | 51.8 | 19.9 |
| Ocular pain | 78.2 | 22.1 |
| Near activities | 42.6 | 30.8 |
| Far activities | 38.6 | 29.2 |
| Social performance | 62.1 | 28.3 |
| Mental health | 69.0 | 25.7 |
| Role difficulties | 68.7 | 24.1 |
| Dependency | 61.2 | 32.3 |
| Driving | 80.6 | 19.9 |
| Colour vision | 69.8 | 25.7 |
| Peripheral vision | 55.5 | 29.1 |
| Global score | **59.6** | **21.4** |

**Outcome of the EQ 5D-5L in the sample of patients with visual impairment**

(Unless otherwise stated, questionnaire score range 1-5, where 5 is poorest quality of life)

| Domains | Mean | Standard deviation |
| --- | --- | --- |
| Mobility | 2.15 | 1.08 |
| Self-care | 1.45 | 0.80 |
| Usual activities | 2.46 | 0.94 |
| Pain or discomfort | 2.40 | 1.09 |
| Anxiety or depression | 1.61 | 0.98 |
| Global health (0-100) | 57.56 | 22.45 |
| Global score* | **0.72** | **0.22** |

***** Determined as described in Ramon-Goñi JM, Pinto-Prades JL, Oppe M, Cabasés JM, Serrano-Aguilar P, Rivero-Arias O. Valuation and modelling of EQ-5D-5L health states using a hybrid approach. Med Care 2017;55:e51-e58. [10.1097/MLR.0000000000000283](https://dx.doi.org/10.1097%2FMLR.0000000000000283)
